# Supplementary material for: Tripartite motif-containing 15 overexpression in non-small cell lung cancer is associated with poor patient prognoses
Source: PubMed Central journal article supplement — J Cancer. 2019 Jan 29;10(4):843–52. doi: 10.7150/jca.27856 (PMC6400804; doi:10.7150/jca.27856), 2019-01-29
Supplement: jcav10p0843s1.pdf [file jcav10p0843s1.pdf]

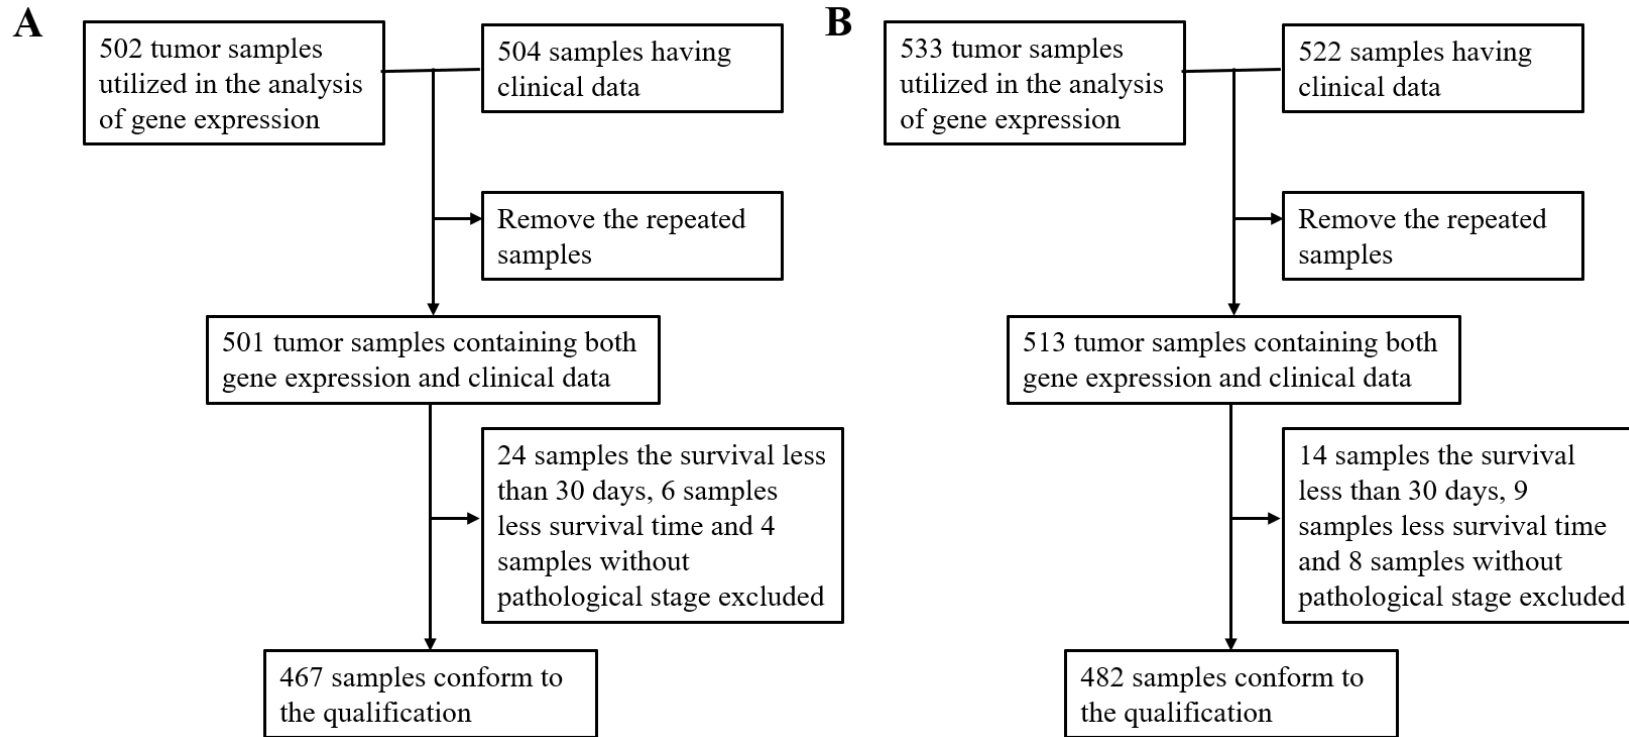

**Figure S1: (A) The consolidation process between clinical data and the RNA sequence data of lung squamous cell carcinoma (LUSC) patients. (B) The consolidation process between clinical data and the RNA sequence data of lung adenocarcinoma (LUAD) patients.**

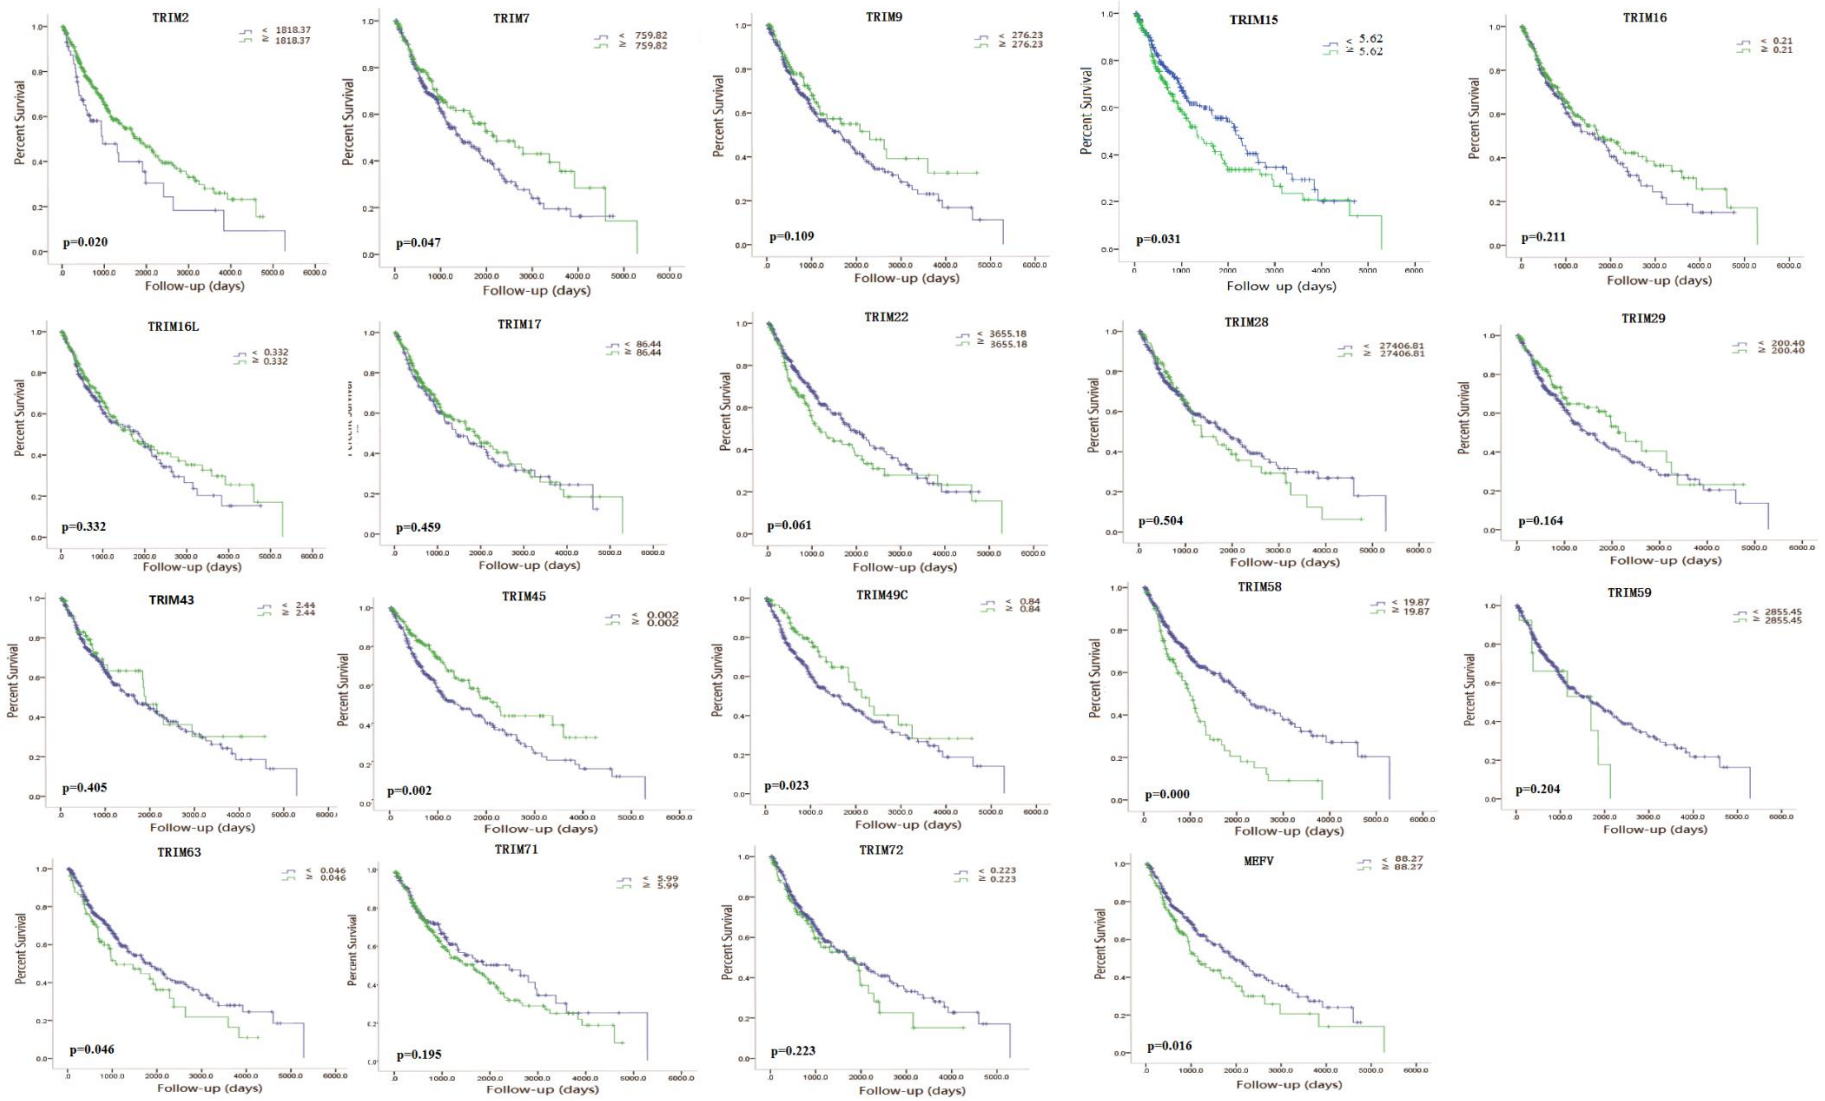

Figure S2: The prognostic value of TRIM family members whose expression were significant in lung squamous cell carcinoma (LUSC).

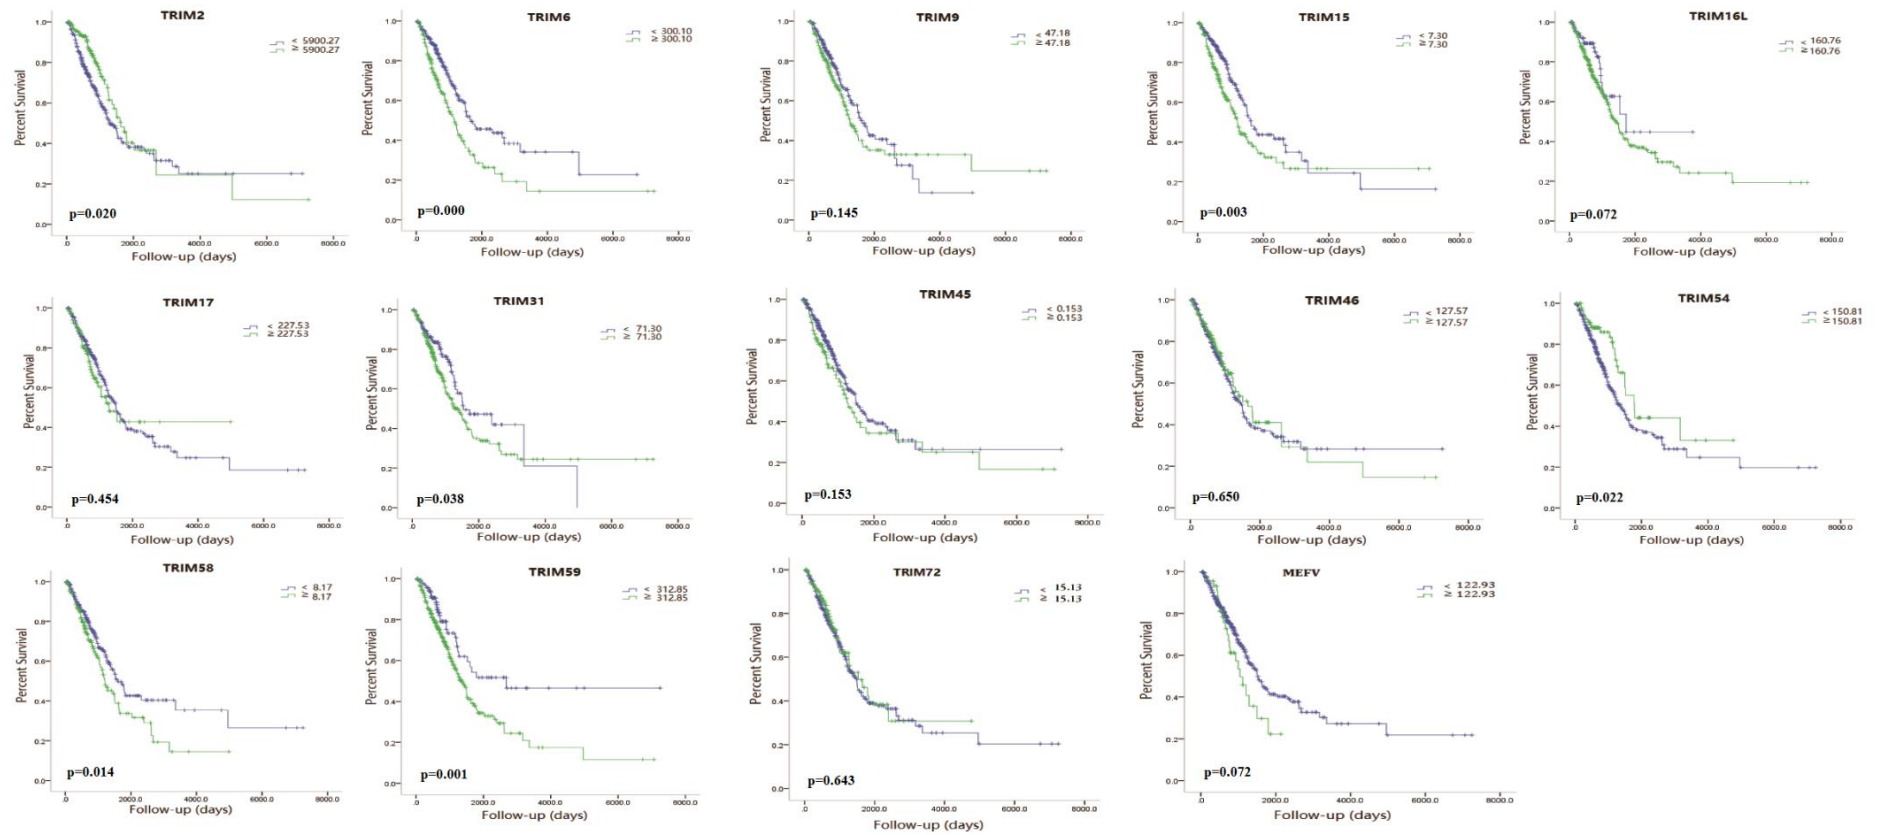

Figure S3: The prognostic value of TRIM family members whose expression were significant in lung adenocarcinoma (LUAD).

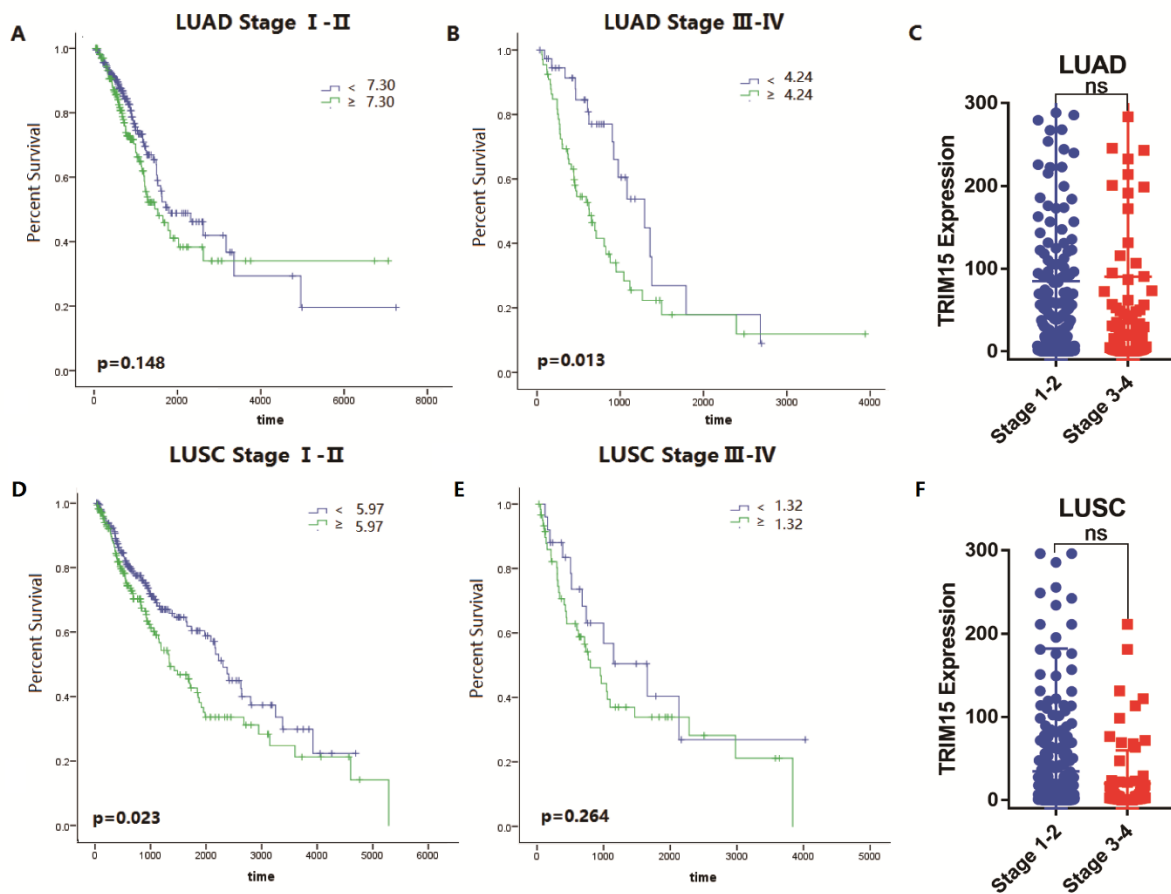

**Figure S4:** The scatter diagram showed that there was no significant difference in expression of TRIM15 between stage I - II and stage III-IV in both LUAD (C) and LUSC (F). The K-M survival curves of TRIM15 in LUAD stage I - II (A,  $p=0.148$ ) and III-IV (B,  $p=0.013$ ), LUSC stage I - II (D,  $p=0.023$ ) and III-IV (E,  $p=0.264$ ) was performed.

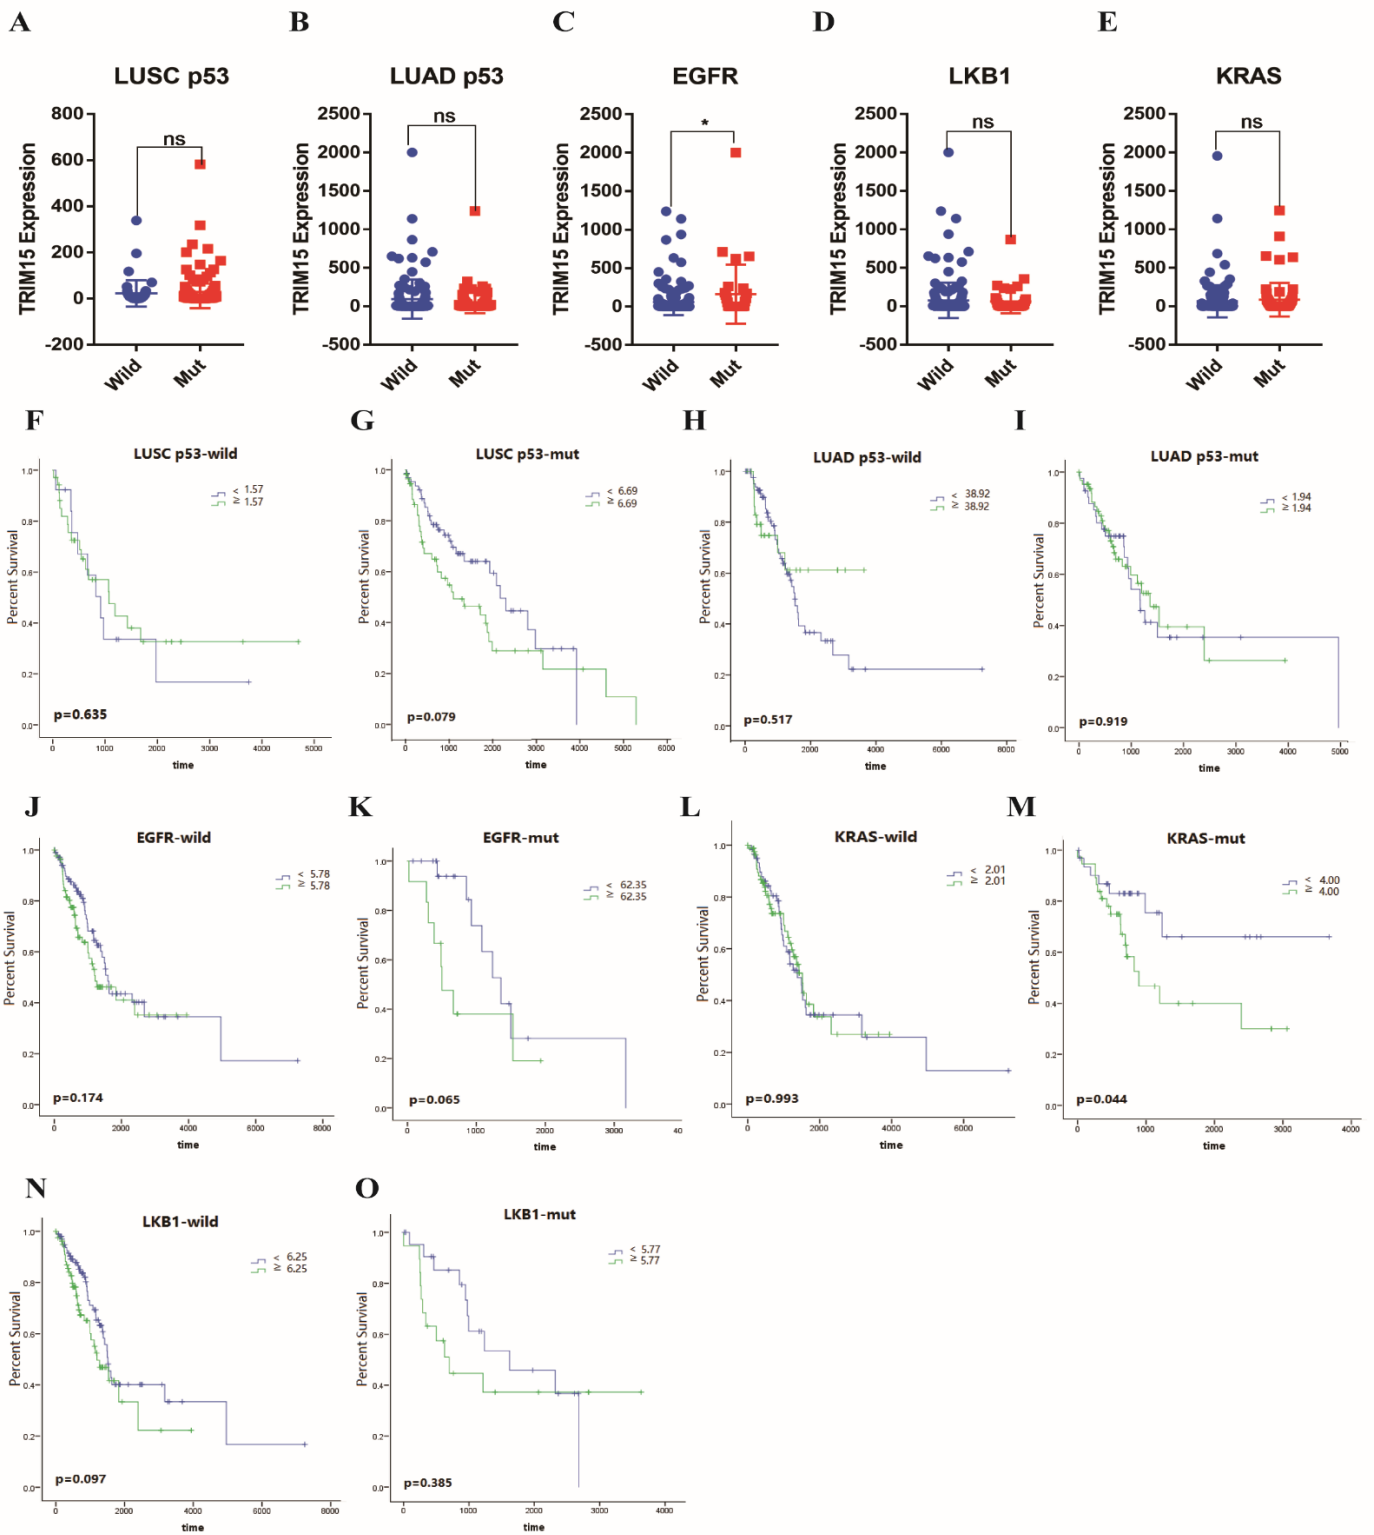

**Figure S5:** In both LUSC (A) and LUAD (B), there was no significant difference in the expression of TRIM15 between p53 mutate and wild patient. In LUAD, the expression of TRIM15 was significant higher in EGFR mutate patients compared with EGFR wild patients (C). There was no significant difference in the expression of TRIM15 between LKB1 mutate and wild patient (D), the same with KRAS (E). The K-M survival curves of TRIM15 in LUSC p53 wild patients (F), LUSC p53 mutate patients (G), LUAD p53 wild patients (H), LUAD p53 mutate patients (I), LUAD EGFR wild patients (J), LUAD EGFR mutate patients (K), LUAD KRAS wild patients (L), LUAD KRAS mutate patients (M), LUAD LKB1 mutate patients (N) and LUAD LKB1 wild patients (O) was performed.

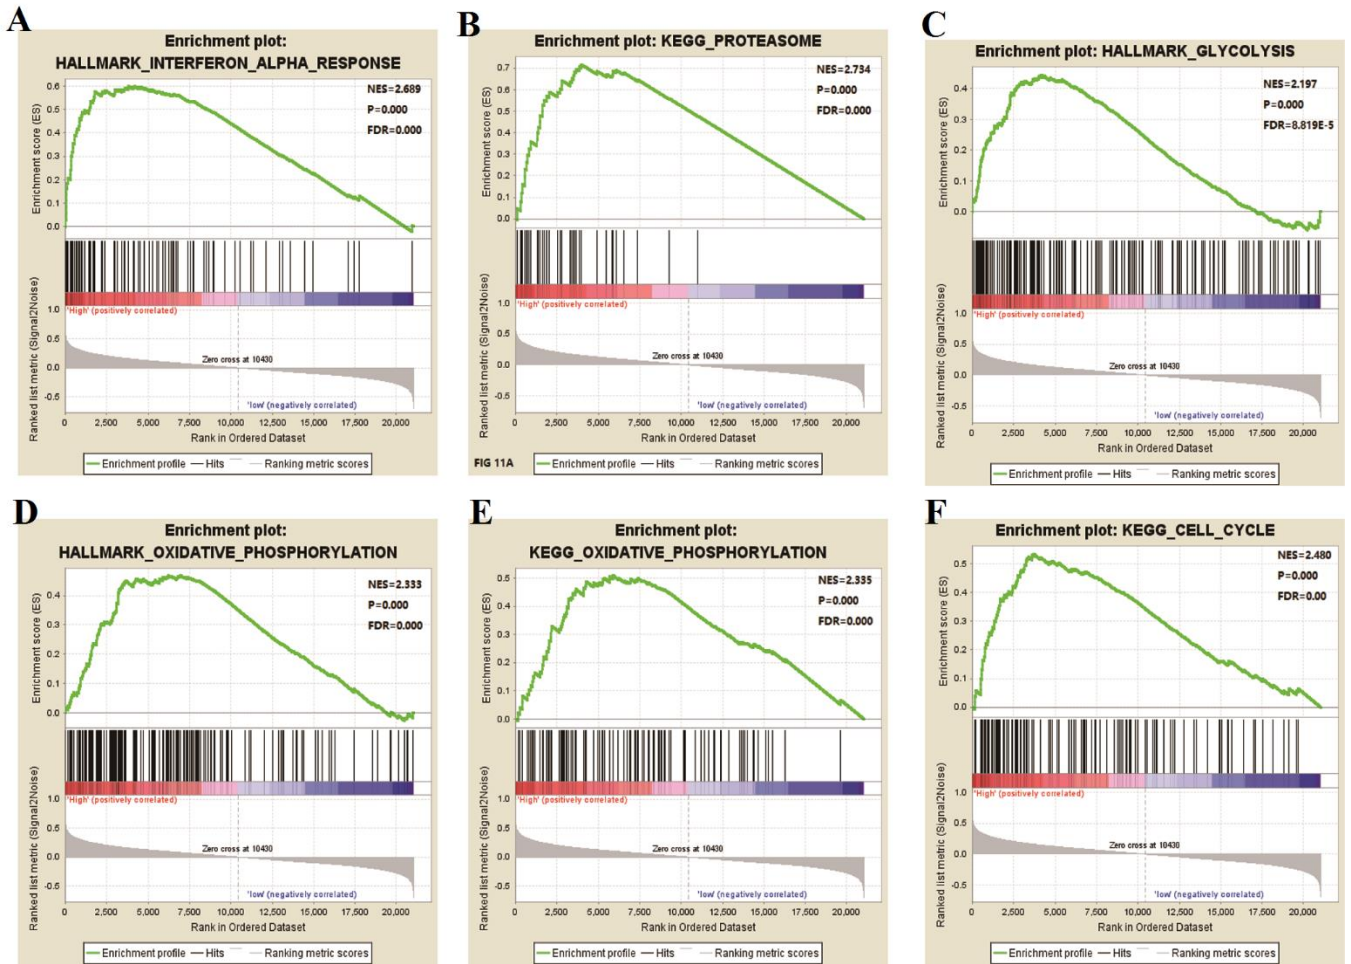

**Figure S6:** Gene set enrichment analysis (GSEA) analysis showed that high expression of TRIM15 was closely associated with various biological processes or signaling pathways, processes associated with interferon(A) and proteasome(B), glycolysis(C), oxidative phosphorylation (D and E) and cell cycle(F).

**A**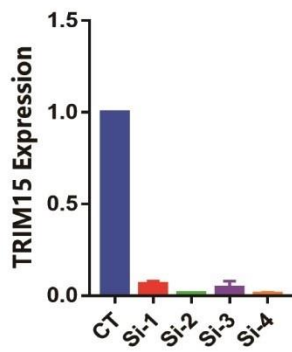**B****H520 CT**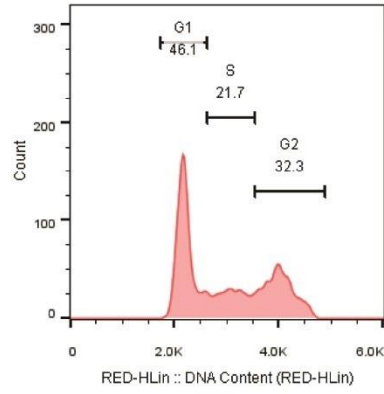**C****H520 SiTRIM15-1**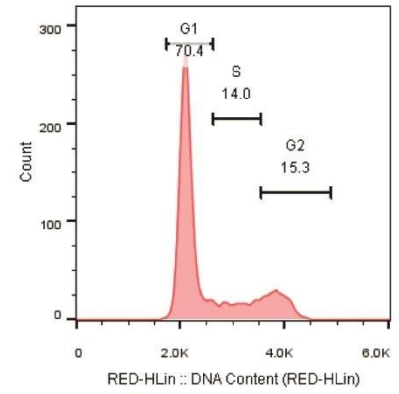**D****H520 SiTRIM15-2**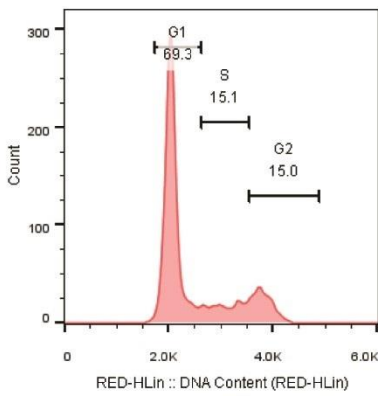**E****H520 SiTRIM15-3**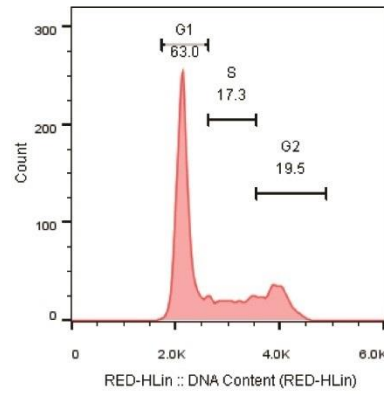**F****H520 SiTRIM15-4**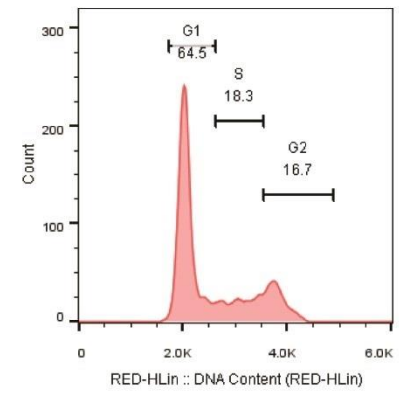

**Figure S7: Verification of TRIM15 knockout efficiency of H520 (A); Cell cycle detection of H520 CT (B); Cell cycle detection of H520 SiTRIM15-1 (C); Cell cycle detection of H520 SiTRIM15-2 (D); Cell cycle detection of H520 SiTRIM15-3 (E); Cell cycle detection of H520 SiTRIM15-4 (F).**

**Table S1. Differential expression analysis of TRIM family members in LUSC and LUAD**

| GENE           | LUSC  |              |          |                  | LUAD  |              |          |                  |
|----------------|-------|--------------|----------|------------------|-------|--------------|----------|------------------|
|                | FC    | log2FC       | p-value  | Adjusted P-value | FC    | log2FC       | p-value  | Adjusted P-value |
| CMYA5 (TRIM76) | 1.20  | 0.26         | 0.67892  | 0.79360          | 1.40  | 0.48         | 0.39567  | 0.58848          |
| MEFV (TRIM20)  | 0.27  | <b>-1.91</b> | 0.00053  | <b>0.00197</b>   | 0.32  | <b>-1.66</b> | 0.00362  | <b>0.01567</b>   |
| MID1 (TRIM18)  | 1.37  | 0.45         | 0.02216  | 0.05286          | 0.84  | -0.26        | 0.17215  | 0.33569          |
| MID2 (TRIM1)   | 1.25  | 0.32         | 0.40303  | 0.55317          | 0.88  | -0.19        | 0.58607  | 0.75268          |
| PML (TRIM19)   | 1.09  | 0.13         | 0.54180  | 0.68330          | 1.04  | 0.06         | 0.88610  | 0.94938          |
| TRIM10         | 2.54  | <b>1.35</b>  | 0.40252  | 0.55275          | 5.65  | 2.50         | 0.05010  | 0.13247          |
| TRIM13         | 0.80  | -0.32        | 0.16893  | 0.28412          | 0.88  | -0.18        | 0.29461  | 0.48571          |
| TRIM14         | 0.85  | -0.24        | 0.13691  | 0.24120          | 0.98  | -0.03        | 0.78279  | 0.88750          |
| TRIM15         | 35.68 | <b>5.16</b>  | 0.00177  | <b>0.00575</b>   | 82.45 | <b>6.37</b>  | 5.05E-08 | <b>6.78E-07</b>  |
| TRIM16         | 3.07  | <b>1.62</b>  | 6.99E-11 | <b>7.15E-10</b>  | 1.36  | 0.45         | 0.06760  | 0.16699          |
| TRIM16L        | 10.77 | <b>3.43</b>  | 1.06E-17 | <b>1.94E-16</b>  | 3.68  | <b>1.88</b>  | 8.98E-06 | <b>8.04E-05</b>  |
| TRIM17         | 4.54  | <b>2.18</b>  | 0.00086  | <b>0.00302</b>   | 4.52  | <b>2.17</b>  | 0.00013  | <b>0.00091</b>   |
| TRIM2          | 2.25  | <b>1.17</b>  | 7.82E-11 | <b>7.97E-10</b>  | 2.69  | <b>1.43</b>  | 1.29E-11 | <b>2.97E-10</b>  |
| TRIM21         | 0.58  | -0.79        | 0.00049  | 0.00182          | 0.76  | -0.40        | 0.05567  | 0.14371          |
| TRIM22         | 0.39  | <b>-1.35</b> | 3.15E-19 | <b>6.44E-18</b>  | 0.63  | -0.67        | 6.65E-05 | 0.00049          |
| TRIM23         | 0.62  | -0.68        | 0.06626  | 0.13251          | 0.90  | -0.15        | 0.49340  | 0.67687          |
| TRIM24         | 1.39  | 0.47         | 0.00948  | 0.02527          | 1.40  | 0.48         | 0.00846  | 0.03136          |
| TRIM26         | 0.99  | -0.02        | 0.85416  | 0.91842          | 1.01  | 0.01         | 0.90801  | 0.96282          |
| TRIM27         | 1.26  | 0.33         | 0.06391  | 0.12872          | 1.72  | 0.78         | 5.84E-05 | 0.00043          |
| TRIM28         | 2.13  | <b>1.09</b>  | 3.72E-08 | <b>2.79E-07</b>  | 1.42  | 0.50         | 0.02146  | 0.06758          |
| TRIM29         | 27.00 | <b>4.75</b>  | 1.88E-70 | <b>3.87E-68</b>  | 2.05  | 1.03         | 0.12176  | 0.26108          |
| TRIM3          | 0.60  | -0.73        | 0.02884  | 0.06618          | 0.78  | -0.36        | 0.16738  | 0.32856          |
| TRIM31         | 4.05  | 2.02         | 0.14268  | 0.24924          | 16.95 | <b>4.08</b>  | 0.00011  | <b>0.00074</b>   |
| TRIM31-AS1     | 1.35  | 0.44         | 0.86936  | 0.92932          | 5.21  | 2.38         | 0.05419  | 0.14067          |
| TRIM32         | 1.38  | 0.47         | 0.07550  | 0.14803          | 1.13  | 0.18         | 0.57868  | 0.74725          |
| TRIM33         | 0.95  | -0.08        | 0.76763  | 0.85813          | 1.05  | 0.07         | 0.66198  | 0.80803          |
| TRIM34         | 0.53  | -0.93        | 0.22219  | 0.35389          | 1.15  | 0.20         | 0.85969  | 0.93408          |
| TRIM35         | 0.95  | -0.07        | 0.66638  | 0.78374          | 0.63  | -0.67        | 0.00568  | 0.02271          |
| TRIM36         | 0.42  | -1.24        | 0.03730  | 0.08243          | 1.05  | 0.07         | 0.87132  | 0.94100          |



|              |        |              |          |                 |        |              |          |                |
|--------------|--------|--------------|----------|-----------------|--------|--------------|----------|----------------|
| TRIM37       | 1.55   | 0.63         | 0.00185  | 0.00596         | 1.51   | 0.60         | 0.00667  | 0.02588        |
| TRIM38       | 0.74   | -0.44        | 0.01782  | 0.04376         | 1.09   | 0.13         | 0.49653  | 0.67952        |
| TRIM39       | 0.75   | -0.41        | 0.17883  | 0.29790         | 0.91   | -0.13        | 0.57895  | 0.74739        |
| TRIM39-RPP21 | 0.92   | -0.13        | 0.77393  | 0.86284         |        |              |          |                |
| TRIM4        | 0.83   | -0.28        | 0.16343  | 0.27688         | 0.88   | -0.18        | 0.29369  | 0.48485        |
| TRIM40       | 0.90   | -0.16        | 0.51916  | 0.66247         | 5.34   | 2.42         | 0.20792  | 0.38392        |
| TRIM41       | 0.95   | -0.08        | 0.56238  | 0.70071         | 1.01   | 0.01         | 0.94414  | 0.98639        |
| TRIM43       | 89.89  | <b>6.49</b>  | 0.00267  | <b>0.00828</b>  | 10.94  | 3.45         | 0.11938  | 0.25691        |
| TRIM44       | 0.74   | -0.44        | 0.00389  | 0.01155         | 0.82   | -0.29        | 0.11456  | 0.24901        |
| TRIM45       | 3.94   | <b>1.98</b>  | 3.21E-05 | <b>0.00015</b>  | 2.48   | <b>1.31</b>  | 0.00743  | <b>0.02829</b> |
| TRIM46       | 1.71   | 0.78         | 0.30945  | 0.45622         | 3.44   | <b>1.78</b>  | 0.00026  | <b>0.00162</b> |
| TRIM47       | 1.22   | 0.29         | 0.23384  | 0.36829         | 1.98   | 0.99         | 2.36E-06 | 2.39E-05       |
| TRIM48       | 398.89 | 8.64         | 0.13755  | 0.24211         | 440.48 | 8.78         | 0.24472  | 0.42950        |
| TRIM49       | 195.98 | 7.61         | 0.04104  | 0.08932         | 45.89  | 5.52         | 0.29740  | 0.48879        |
| TRIM49B      | 127.80 | 7.00         | 0.22515  | 0.35738         |        |              |          |                |
| TRIM49C      | 38.77  | <b>5.28</b>  | 0.01353  | <b>0.03444</b>  |        |              |          |                |
| TRIM5        | 0.61   | -0.71        | 0.00257  | 0.00800         | 0.98   | -0.03        | 0.91047  | 0.96450        |
| TRIM50       | 0.56   | -0.83        | 0.31935  | 0.46749         | 1.62   | 0.69         | 0.59242  | 0.75723        |
| TRIM52       | 0.81   | -0.31        | 0.35293  | 0.50239         | 1.12   | 0.17         | 0.60825  | 0.76819        |
| TRIM52-AS1   | 0.61   | -0.72        | 0.08984  | 0.17118         | 0.69   | -0.54        | 0.13497  | 0.28166        |
| TRIM53AP     | 7.08   | 2.82         | 0.82995  | 0.90187         | 17.69  | 4.14         | 0.54210  | 0.71806        |
| TRIM54       | 5.50   | 2.46         | 0.15150  | 0.26126         | 13.18  | <b>3.72</b>  | 3.04E-05 | <b>0.00024</b> |
| TRIM55       | 0.77   | -0.38        | 0.48006  | 0.62542         | 1.84   | 0.88         | 0.42318  | 0.61445        |
| TRIM56       | 0.65   | -0.63        | 2.25E-05 | 0.00011         | 0.72   | -0.47        | 0.00607  | 0.02395        |
| TRIM58       | 0.24   | <b>-2.05</b> | 0.00473  | <b>0.01373</b>  | 0.23   | <b>-2.12</b> | 0.00234  | <b>0.01086</b> |
| TRIM59       | 5.72   | <b>2.51</b>  | 1.58E-13 | <b>2.09E-12</b> | 2.81   | <b>1.49</b>  | 7.99E-05 | <b>0.00057</b> |
| TRIM6        | 1.15   | 0.21         | 0.77895  | 0.86624         | 2.24   | <b>1.17</b>  | 0.01015  | <b>0.03651</b> |
| TRIM61       | 0.42   | -1.26        | 0.11707  | 0.21297         | 0.76   | -0.40        | 0.60826  | 0.76819        |
| TRIM62       | 1.42   | 0.50         | 0.22876  | 0.36215         | 1.39   | 0.47         | 0.22510  | 0.40547        |
| TRIM63       | 0.23   | <b>-2.11</b> | 0.00770  | <b>0.02108</b>  | 0.58   | -0.79        | 0.26827  | 0.45664        |
| TRIM65       | 1.46   | 0.54         | 0.01609  | 0.04012         | 1.29   | 0.37         | 0.09159  | 0.21024        |
| TRIM66       | 0.85   | -0.23        | 0.44754  | 0.59638         | 1.10   | 0.14         | 0.66318  | 0.80889        |
| TRIM67       | 3.58   | 1.84         | 0.14791  | 0.25634         | 5.54   | 2.47         | 0.05996  | 0.15187        |

|        |       |              |          |                 |       |             |         |                |
|--------|-------|--------------|----------|-----------------|-------|-------------|---------|----------------|
| TRIM68 | 0.88  | -0.19        | 0.58413  | 0.71885         | 1.38  | 0.46        | 0.05851 | 0.14904        |
| TRIM69 | 0.94  | -0.10        | 0.62019  | 0.74805         | 0.70  | -0.51       | 0.00681 | 0.02632        |
| TRIM7  | 7.68  | <b>2.94</b>  | 2.97E-11 | <b>3.16E-10</b> | 1.72  | 0.78        | 0.27999 | 0.47034        |
| TRIM71 | 0.14  | <b>-2.85</b> | 1.62E-05 | <b>8.14E-05</b> | 0.34  | -1.56       | 0.05491 | 0.14212        |
| TRIM72 | 17.67 | <b>4.14</b>  | 0.00451  | <b>0.01317</b>  | 19.92 | <b>4.32</b> | 0.00070 | <b>0.00385</b> |
| TRIM73 | 1.45  | 0.54         | 0.77289  | 0.86218         | 1.28  | 0.36        | 0.89454 | 0.95471        |
| TRIM74 | 1.48  | 0.56         | 0.77147  | 0.86088         | 1.04  | 0.06        | 1.00000 | 1.00000        |
| TRIM8  | 0.61  | -0.71        | 5.57E-07 | 3.52E-06        | 1.12  | 0.16        | 0.45299 | 0.64247        |
| TRIM9  | 7.05  | <b>2.82</b>  | 4.20E-05 | <b>0.00019</b>  | 6.74  | <b>2.75</b> | 0.00073 | <b>0.00399</b> |
| TRIML1 | 3.39  | 1.76         | 0.28457  | 0.42744         | 3.82  | 1.93        | 0.47889 | 0.66484        |
| TRIML2 | 16.26 | 4.02         | 0.06150  | 0.12478         |       |             |         |                |

---

**Table S2. The univariable Cox proportion hazards analysis of TRIM gene family members in LUSC and LUAD**

|           | LUAD  |           |          |                  | LUSC  |           |          |              |
|-----------|-------|-----------|----------|------------------|-------|-----------|----------|--------------|
|           | HR    | 95.0% CI  |          | p                | HR    | 95.0% CI  |          | p            |
|           |       | Low limit | up limit |                  |       | low limit | up limit |              |
| MEFV      | 1.494 | 0.962     | 2.321    | 0.074            | 1.443 | 1.078     | 1.931    | <b>0.014</b> |
| MID1      | 1.426 | 1.040     | 1.954    | <b>0.028</b>     | 0.788 | 0.563     | 1.103    | 0.164        |
| MID2      | 0.823 | 0.596     | 1.138    | 0.239            | 0.735 | 0.554     | 0.975    | <b>0.033</b> |
| PML       | 1.388 | 1.026     | 1.877    | <b>0.033</b>     | 1.322 | 0.992     | 1.760    | 0.057        |
| TRIM10    | 1.363 | 1.014     | 1.833    | <b>0.040</b>     | 1.388 | 1.044     | 1.847    | <b>0.024</b> |
| TRIM13    | 0.643 | 0.457     | 0.906    | <b>0.012</b>     | 1.202 | 0.905     | 1.596    | 0.204        |
| TRIM14    | 1.383 | 0.923     | 2.073    | 0.116            | 1.385 | 1.031     | 1.861    | <b>0.031</b> |
| TRIM15    | 1.560 | 1.159     | 2.101    | <b>0.003</b>     | 1.353 | 1.023     | 1.789    | <b>0.034</b> |
| TRIM16    | 1.781 | 1.320     | 2.402    | <b>&lt;0.001</b> | 0.837 | 0.633     | 1.107    | 0.212        |
| TRIM16L   | 1.531 | 0.959     | 2.444    | 0.074            | 0.871 | 0.658     | 1.152    | 0.332        |
| TRIM17    | 1.141 | 0.808     | 1.613    | 0.454            | 0.897 | 0.673     | 1.196    | 0.460        |
| TRIM2     | 0.672 | 0.479     | 0.941    | <b>0.021</b>     | 0.637 | 0.433     | 0.935    | <b>0.021</b> |
| TRIM21    | 1.383 | 0.954     | 2.005    | 0.087            | 1.277 | 0.965     | 1.690    | 0.087        |
| TRIM22    | 0.632 | 0.444     | 0.900    | <b>0.011</b>     | 1.319 | 0.986     | 1.765    | 0.062        |
| TRIM23    | 0.704 | 0.523     | 0.947    | <b>0.020</b>     | 0.626 | 0.380     | 1.030    | 0.065        |
| TRIM24    | 0.628 | 0.466     | 0.846    | <b>0.002</b>     | 2.050 | 1.208     | 3.480    | <b>0.008</b> |
| TRIM26    | 0.816 | 0.606     | 1.099    | 0.181            | 0.831 | 0.614     | 1.124    | 0.230        |
| TRIM27    | 0.685 | 0.507     | 0.927    | <b>0.014</b>     | 1.270 | 0.943     | 1.710    | 0.116        |
| TRIM28    | 1.678 | 1.246     | 2.259    | <b>0.001</b>     | 0.706 | 0.429     | 1.163    | 0.172        |
| TRIM29    | 1.673 | 1.146     | 2.444    | <b>0.008</b>     | 0.760 | 0.545     | 1.060    | 0.106        |
| TRIM3     | 1.993 | 0.817     | 4.863    | 0.130            | 1.864 | 1.169     | 2.972    | <b>0.009</b> |
| TRIM31    | 1.416 | 1.018     | 1.971    | <b>0.039</b>     |       |           |          |              |
| TRIM31AS1 | 0.685 | 0.421     | 1.116    | 0.129            | 2.080 | 1.063     | 4.073    | <b>0.033</b> |
| TRIM32    | 1.162 | 0.863     | 1.565    | 0.322            | 1.301 | 0.982     | 1.723    | 0.067        |
| TRIM33    | 1.323 | 0.961     | 1.822    | 0.087            | 0.759 | 0.562     | 1.024    | 0.071        |
| TRIM34    | 1.298 | 0.963     | 1.751    | 0.087            | 1.773 | 1.213     | 2.591    | <b>0.003</b> |
| TRIM35    | 0.631 | 0.387     | 1.028    | 0.065            | 0.809 | 0.583     | 1.123    | 0.205        |
| TRIM36    | 1.203 | 0.861     | 1.681    | 0.278            | 1.223 | 0.921     | 1.624    | 0.165        |
| TRIM37    | 1.231 | 0.915     | 1.656    | 0.169            | 1.265 | 0.953     | 1.679    | 0.104        |

|            |       |       |        |                  |       |       |       |              |
|------------|-------|-------|--------|------------------|-------|-------|-------|--------------|
| TRIM38     | 0.598 | 0.436 | 0.820  | <b>0.001</b>     | 0.593 | 0.344 | 1.023 | 0.060        |
| TRIM39     | 0.666 | 0.491 | 0.903  | <b>0.009</b>     | 1.450 | 0.930 | 2.261 | 0.101        |
| TRIM39RPP2 |       |       |        |                  | 0.856 | 0.646 | 1.134 | 0.279        |
| TRIM4      | 0.711 | 0.465 | 1.086  | 0.114            | 0.411 | 0.217 | 0.777 | <b>0.006</b> |
| TRIM40     | 1.369 | 1.013 | 1.851  | <b>0.041</b>     | 1.199 | 0.835 | 1.721 | 0.326        |
| TRIM41     | 1.434 | 0.813 | 2.529  | 0.213            | 0.741 | 0.500 | 1.100 | 0.137        |
| TRIM43     | 1.302 | 0.863 | 1.964  | 0.208            | 0.839 | 0.555 | 1.269 | 0.406        |
| TRIM44     | 4.744 | 1.175 | 19.163 | <b>0.029</b>     | 0.622 | 0.458 | 0.844 | <b>0.002</b> |
| TRIM45     | 1.273 | 0.914 | 1.774  | 0.154            | 1.616 | 0.993 | 2.630 | 0.053        |
| TRIM46     | 2.602 | 1.151 | 5.881  | <b>0.022</b>     | 1.423 | 1.012 | 2.002 | <b>0.043</b> |
| TRIM47     | 1.452 | 1.062 | 1.987  | <b>0.020</b>     | 1.136 | 0.756 | 1.707 | 0.540        |
| TRIM48     | 0.601 | 0.354 | 1.020  | 0.059            | 0.808 | 0.527 | 1.240 | 0.330        |
| TRIM49     | 0.667 | 0.457 | 0.974  | <b>0.036</b>     | 0.636 | 0.429 | 0.944 | <b>0.025</b> |
| TRIM5      | 1.270 | 0.942 | 1.712  | 0.116            | 1.607 | 1.122 | 2.302 | <b>0.010</b> |
| TRIM50     | 0.636 | 0.458 | 0.883  | <b>0.007</b>     | 1.280 | 0.967 | 1.695 | 0.085        |
| TRIM52     | 0.734 | 0.545 | 0.990  | <b>0.043</b>     |       |       |       |              |
| TRIM52AS1  | 0.703 | 0.517 | 0.956  | <b>0.025</b>     | 1.167 | 0.846 | 1.608 | 0.347        |
| TRIM53AP   | 5.402 | 1.707 | 17.094 | <b>0.004</b>     | 0.706 | 0.429 | 1.162 | 0.170        |
| TRIM54     | 0.612 | 0.400 | 0.935  | <b>0.023</b>     | 1.213 | 0.900 | 1.635 | 0.205        |
| TRIM55     | 0.601 | 0.427 | 0.846  | <b>0.003</b>     | 1.484 | 1.110 | 1.984 | <b>0.008</b> |
| TRIM56     | 1.161 | 0.829 | 1.626  | 0.385            | 0.881 | 0.631 | 1.231 | 0.457        |
| TRIM58     | 1.445 | 1.075 | 1.944  | <b>0.015</b>     | 2.039 | 1.495 | 2.782 | <b>0.000</b> |
| TRIM59     | 1.825 | 1.253 | 2.657  | <b>0.002</b>     |       |       |       |              |
| TRIM6      | 1.780 | 1.323 | 2.394  | <b>&lt;0.001</b> | 1.336 | 0.990 | 1.802 | 0.058        |
| TRIM61     | 0.555 | 0.137 | 2.245  | 0.409            | 1.673 | 1.246 | 2.246 | <b>0.001</b> |
| TRIM62     | 0.649 | 0.481 | 0.873  | <b>0.004</b>     | 1.610 | 1.077 | 2.405 | <b>0.020</b> |
| TRIM63     | 0.809 | 0.596 | 1.100  | 0.176            | 1.402 | 1.005 | 1.956 | <b>0.047</b> |
| TRIM65     | 0.790 | 0.588 | 1.062  | 0.118            | 1.861 | 0.822 | 4.212 | 0.136        |
| TRIM66     | 0.869 | 0.636 | 1.188  | 0.380            | 1.541 | 0.987 | 2.407 | 0.057        |
| TRIM67     | 1.310 | 0.969 | 1.772  | 0.079            | 0.830 | 0.605 | 1.138 | 0.246        |
| TRIM68     | 0.665 | 0.476 | 0.929  | <b>0.017</b>     | 1.348 | 1.019 | 1.785 | <b>0.037</b> |
| TRIM69     | 1.352 | 0.994 | 1.840  | 0.055            | 1.236 | 0.932 | 1.638 | 0.141        |
| TRIM7      | 1.812 | 1.337 | 2.456  | <b>&lt;0.001</b> | 0.738 | 0.547 | 0.998 | <b>0.048</b> |

|        |       |       |       |              |       |       |       |       |
|--------|-------|-------|-------|--------------|-------|-------|-------|-------|
| TRIM71 | 0.880 | 0.650 | 1.191 | 0.408        | 1.215 | 0.904 | 1.632 | 0.196 |
| TRIM72 | 0.919 | 0.643 | 1.313 | 0.643        | 1.233 | 0.880 | 1.726 | 0.224 |
| TRIM73 | 0.769 | 0.543 | 1.089 | 0.139        |       |       |       |       |
| TRIM74 | 0.765 | 0.568 | 1.028 | 0.076        |       |       |       |       |
| CMYA5  |       |       |       |              | 1.215 | 0.827 | 1.786 | 0.320 |
| TRIM8  | 0.750 | 0.533 | 1.053 | 0.097        | 1.221 | 0.879 | 1.696 | 0.233 |
| TRIM9  | 1.246 | 0.926 | 1.677 | 0.146        | 0.757 | 0.538 | 1.065 | 0.110 |
| TRIML1 |       |       |       |              | 1.336 | 0.991 | 1.801 | 0.057 |
| TRIML2 | 1.563 | 1.114 | 2.192 | <b>0.010</b> | 1.259 | 0.920 | 1.723 | 0.150 |

---









| Variables                     | Number (%) |
|-------------------------------|------------|
| Gender                        |            |
| Male                          | 12 (70.6%) |
| Female                        | 5(29.4%)   |
| Age                           |            |
| <65                           | 13 (76.5%) |
| ≥65                           | 4 (23.5 %) |
| Differentiation               |            |
| Well/moderate differentiation | 3 (17.6%)  |
| Poor differentiation          | 14 (82.4%) |
| Histology                     |            |
| Adenocarcinoma                | 8(47.1%)   |
| Squamous cell carcinoma       | 9(52.9%)   |
| Pathological Tumor Stage      |            |
| T <sub>1-2</sub>              | 10 (58.8%) |
| T <sub>3-4</sub>              | 7 (41.2%)  |
| Pathological Nodal Stage      |            |
| N <sub>0</sub>                | 4 (23.6%)  |
| N <sub>1</sub>                | 3 (17.6%)  |
| N <sub>2</sub>                | 10(58.8%)  |
| TNM                           |            |
| I-II                          | 6 (35.3%)  |
| III                           | 11(64.7%)  |

**Table S4. The clinicopathologic features of 17 patients**
